# Supplementary material for: First Evidence That Nematode Communities in Deadwood Are Related to Tree Species Identity and to Co-Occurring Fungi and Prokaryotes
Source: MDPI journal article supplement (doi:10.3390/microorganisms9071454), 2021-07-06

A

## Nematodes vs Prokaryotes in Sapwood

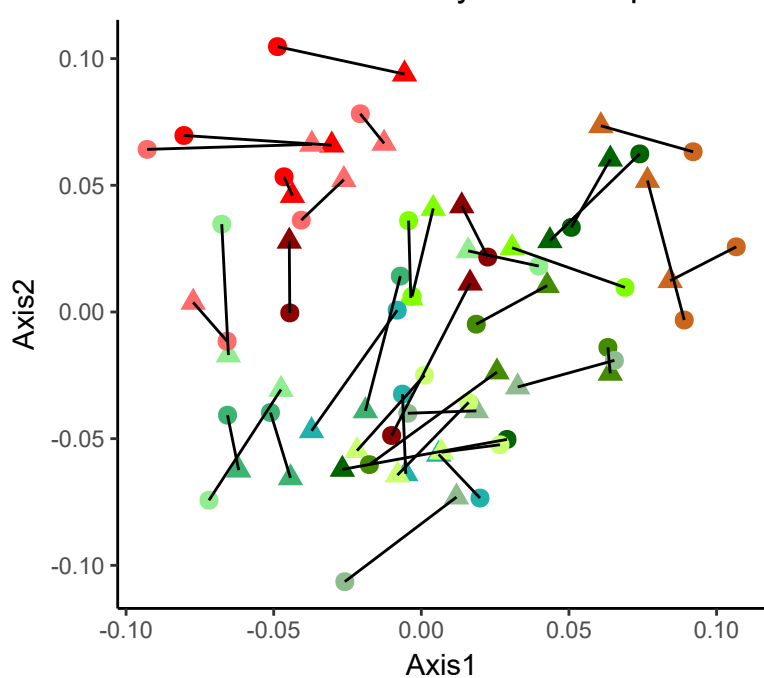

B

## Nematodes vs Fungi in Sapwood

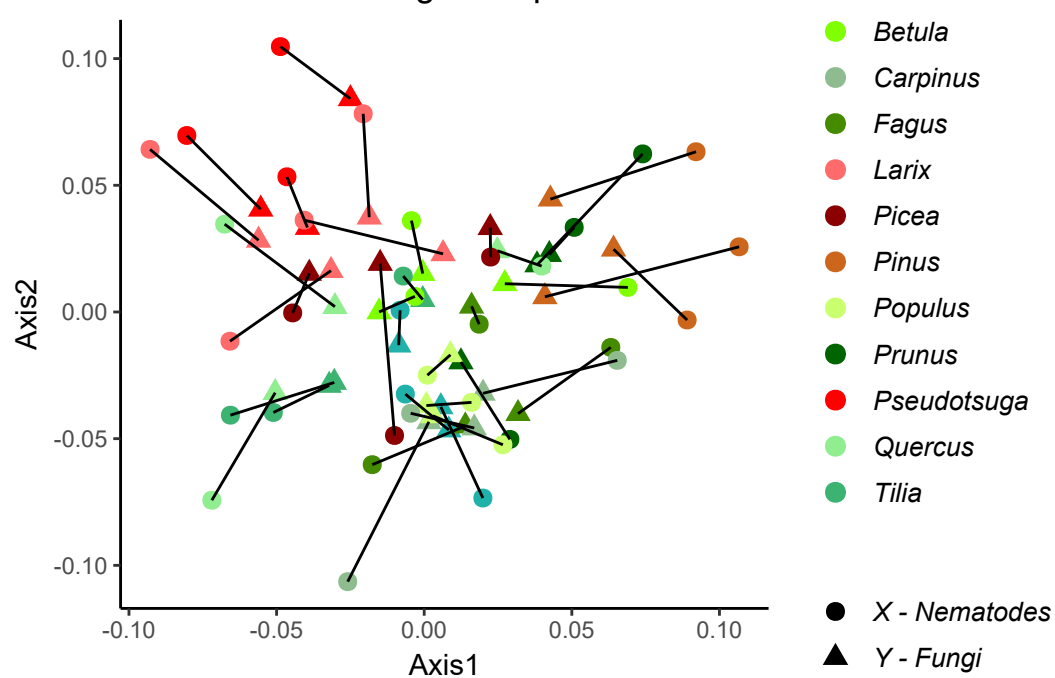

C

## Nematodes vs Prokaryotes in Heartwood

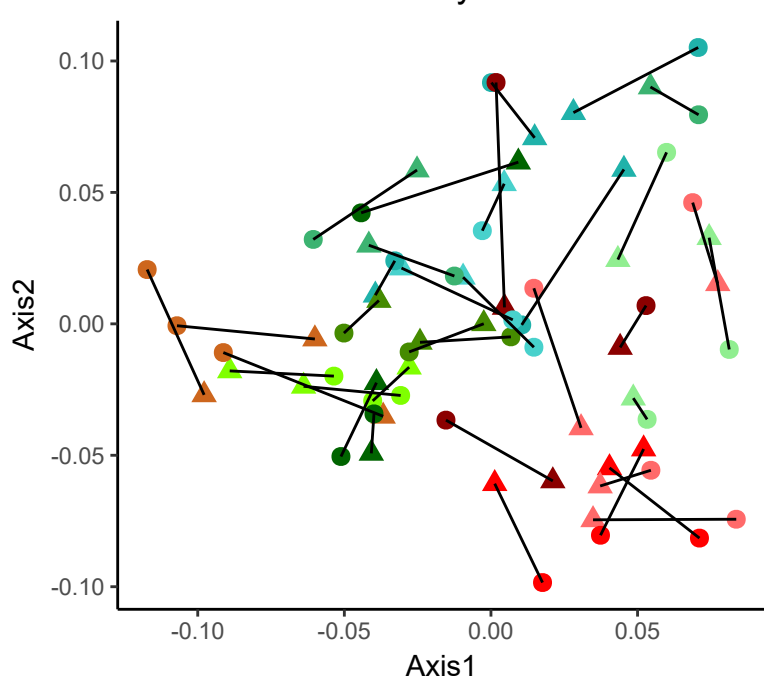

D

## Nematodes vs Fungi in Heartwood

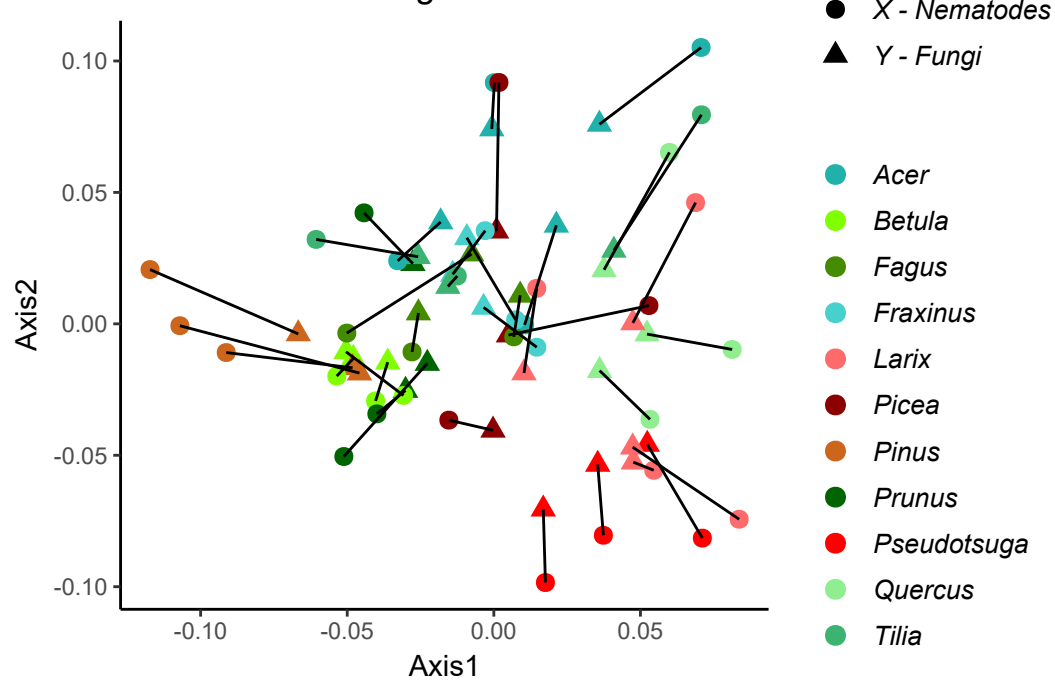

Supplement: s1 [file s1]
