# Supplementary material for: First Evidence That Nematode Communities in Deadwood Are Related to Tree Species Identity and to Co-Occurring Fungi and Prokaryotes
Source: MDPI journal article supplement (doi:10.3390/microorganisms9071454), 2021-07-06
Supplement: s1 [file s1]

## Supporting information

### First evidence that nematode communities in deadwood are related to tree species identity and to co-occurring fungi and prokaryotes

Julia Moll, Friederike Roy, Claus Bässler, Jacob Heilmann-Clausen, Martin Hofrichter, Harald Kellner, Doris Krabel, Jan Henrik Schmidt, François Buscot, Björn Hoppe

Table S1: Spearman's rank correlation test between bacterivores and prokaryotic  $\alpha$ -diversities, between fungivores  $\alpha$ -diversity and fungal  $\alpha$ -diversity and between fungal biomass (ergosterol) and fungivores  $\alpha$ -diversity for both wood compartments and for sapwood and heartwood separately; ns = not significant.

|                                                                      | Both             | Sapwood          | Heartwood      |
|----------------------------------------------------------------------|------------------|------------------|----------------|
| Prokaryotic $\alpha$ -diversity vs. bacterivores $\alpha$ -diversity |                  |                  |                |
| Spearman's $\rho$                                                    | 0.4614347        | 0.5592075        | 0.3331085      |
| <i>P</i> value                                                       | <b>2.403e-05</b> | <b>0.0002151</b> | <b>0.04099</b> |
| Fungal $\alpha$ -diversity vs. fungivores $\alpha$ -diversity        |                  |                  |                |
| Spearman's $\rho$                                                    | 0.1298779        | 0.05293589       | 0.1839097      |
| <i>P</i> value                                                       | ns               | ns               | ns             |
| Fungal biomass (ergosterol) vs. fungivores $\alpha$ -diversity       |                  |                  |                |
| Spearman's $\rho$                                                    | -0.04781332      | -0.1410455       | -0.09970198    |
| <i>P</i> value                                                       | ns               | ns               | ns             |
