# Supplementary figures and images for: First Evidence That Nematode Communities in Deadwood Are Related to Tree Species Identity and to Co-Occurring Fungi and Prokaryotes
Source: MDPI journal article supplement (doi:10.3390/microorganisms9071454), 2021-07-06

### Sapwood

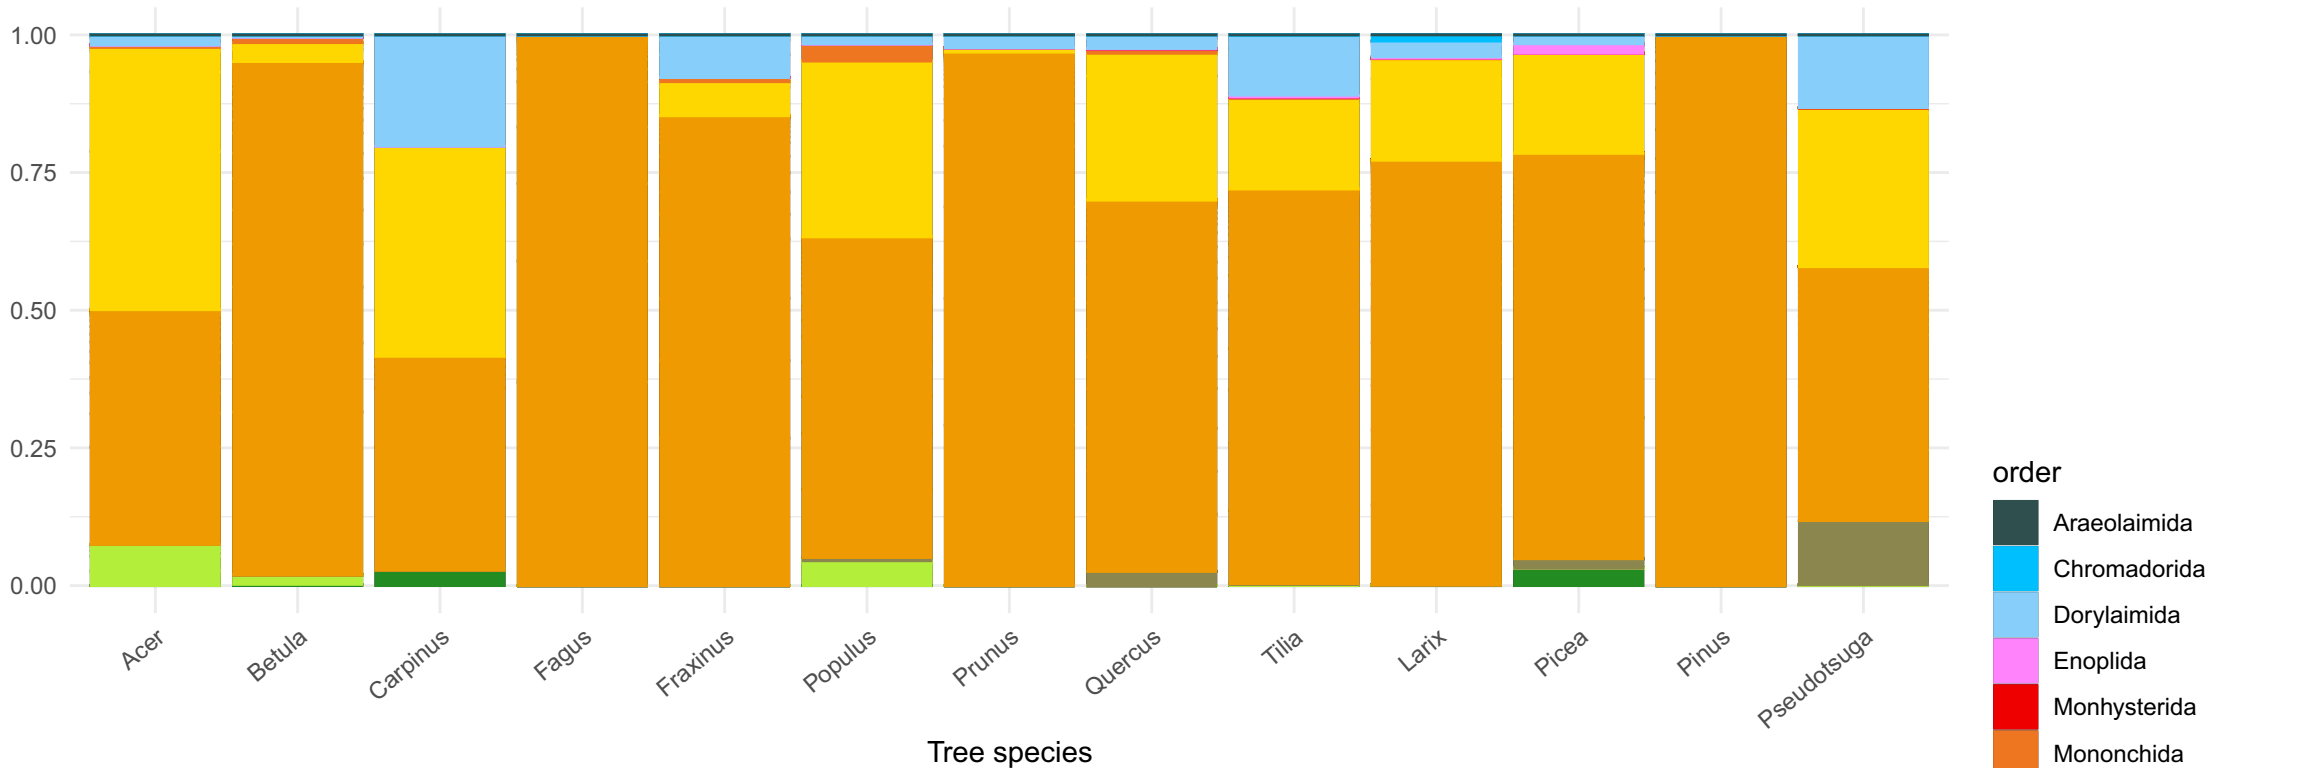

### Heartwood

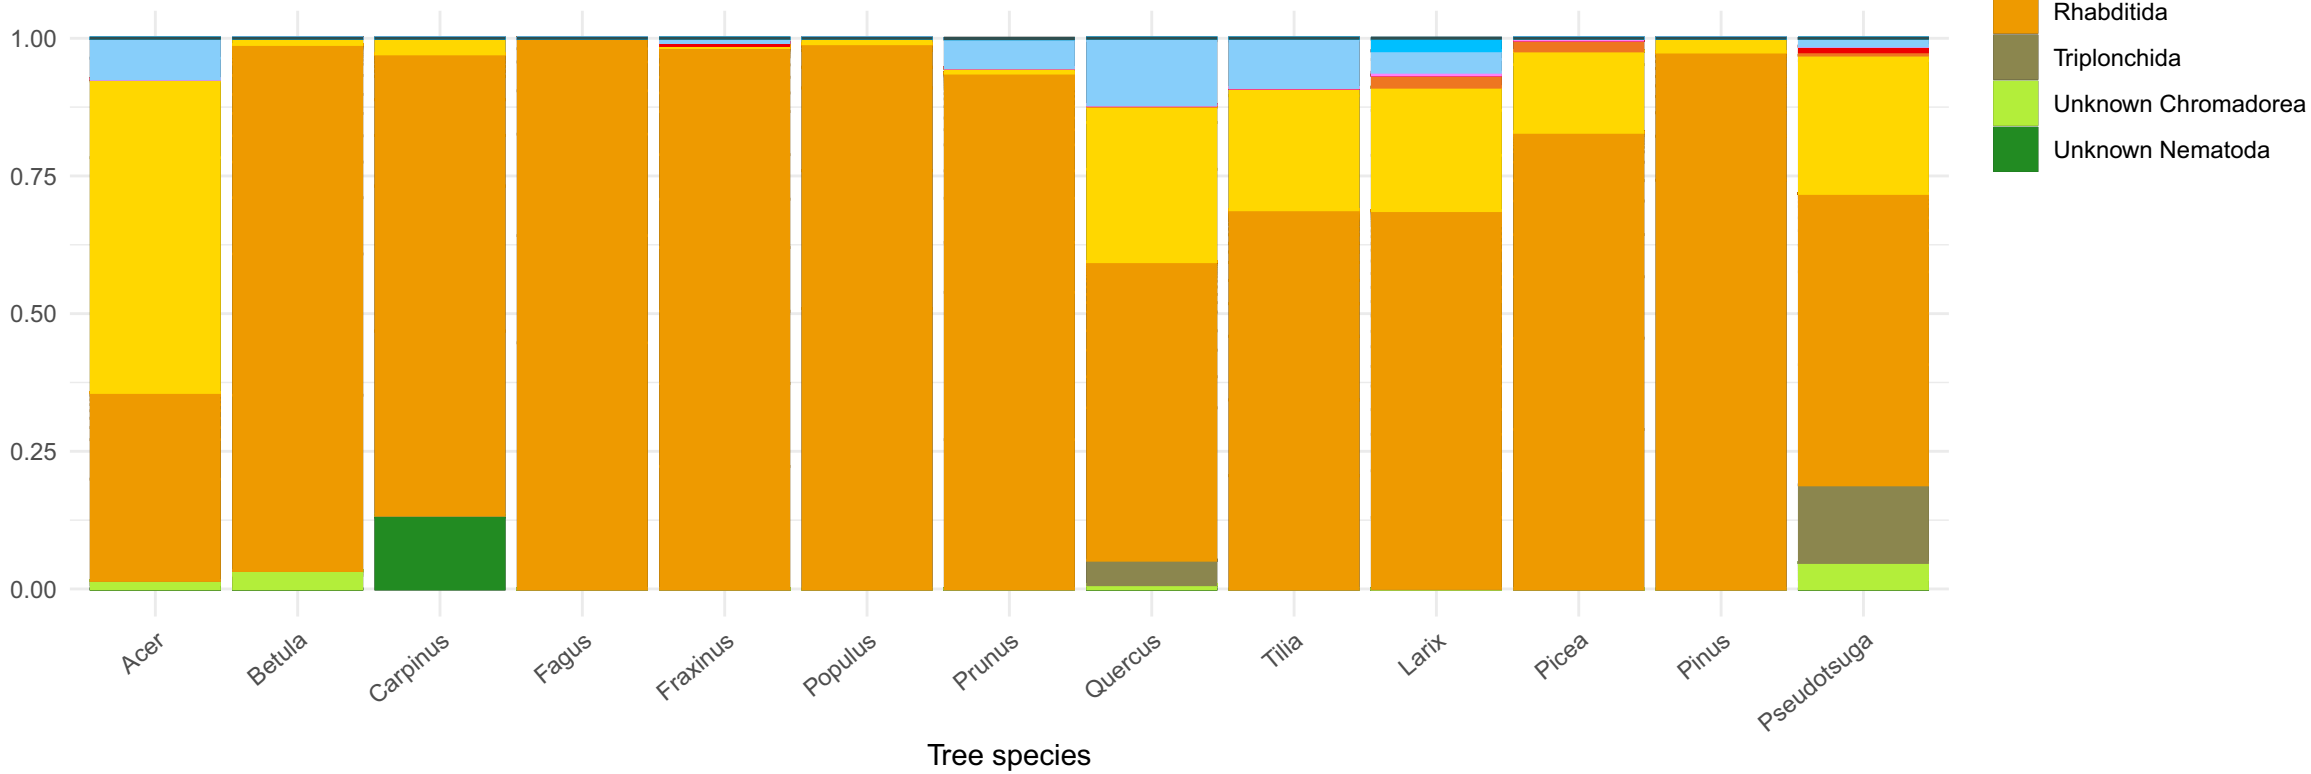

Supplement: s1 [file s1]

## Sapwood

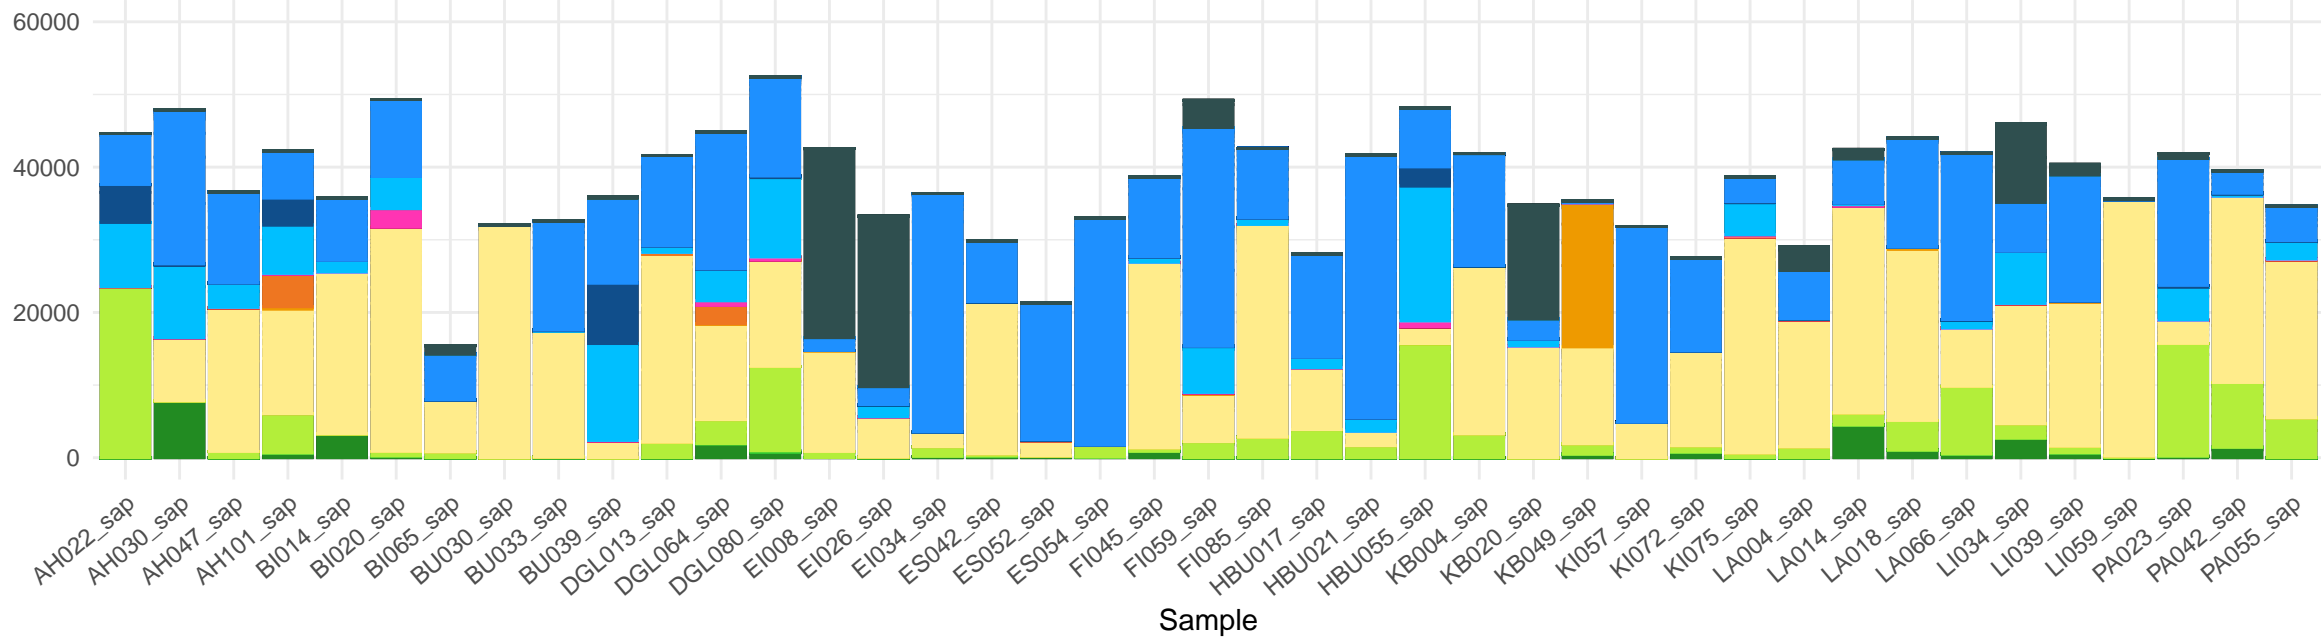

## Heartwood

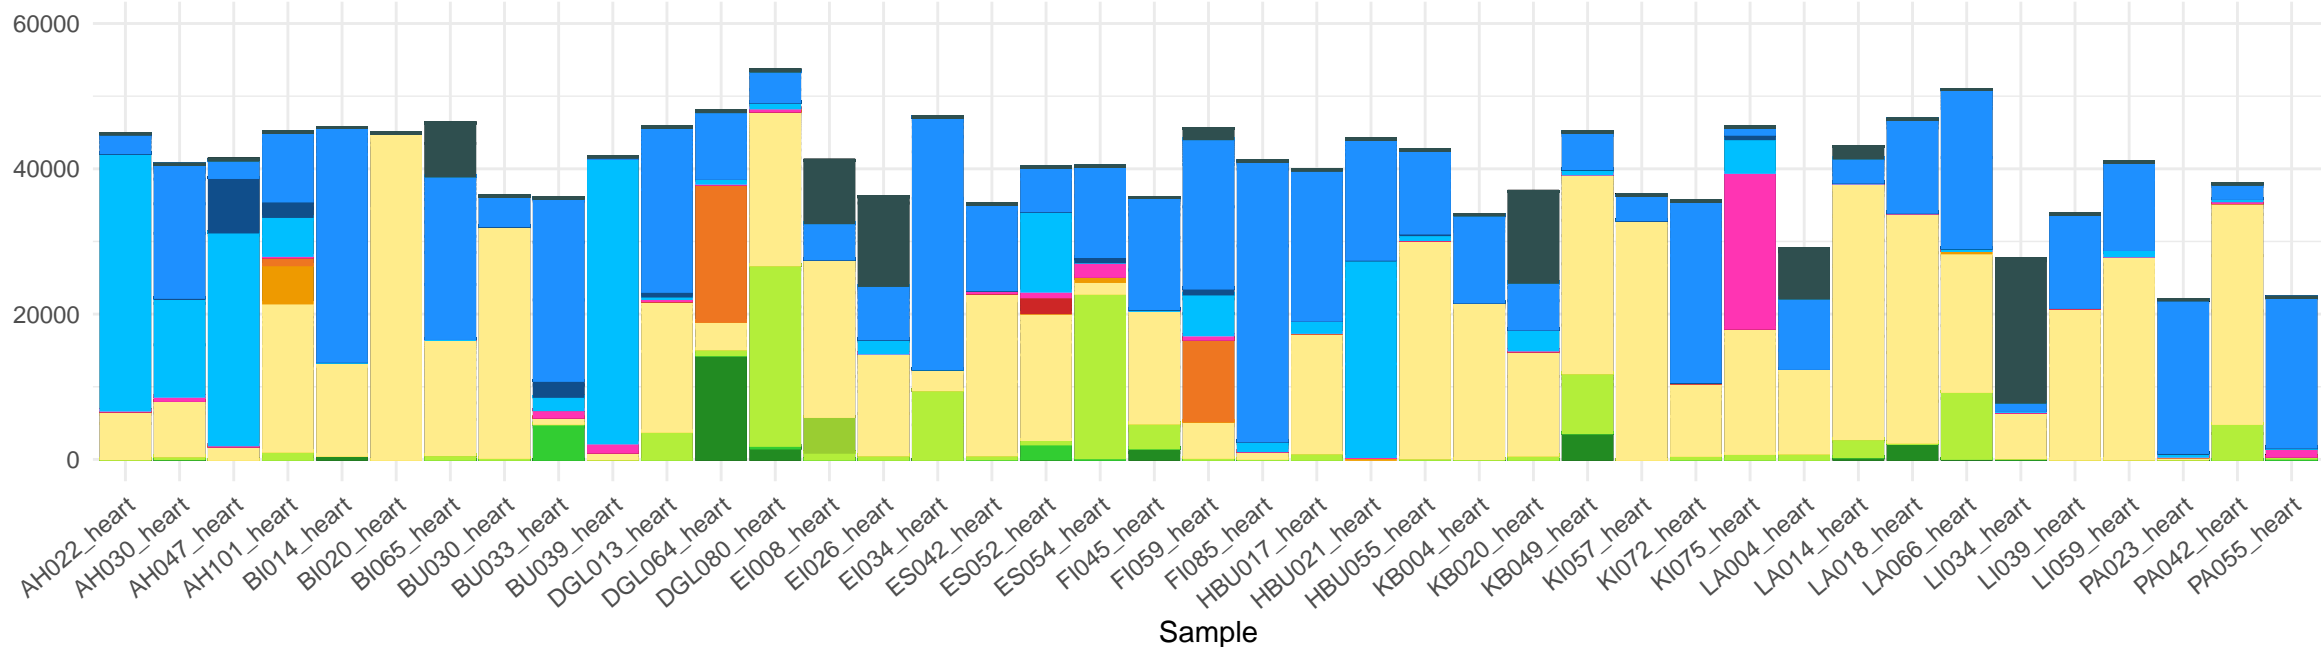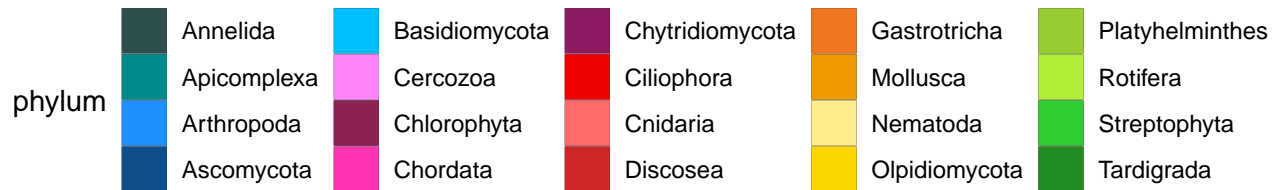

Supplement: s1 [file s1]

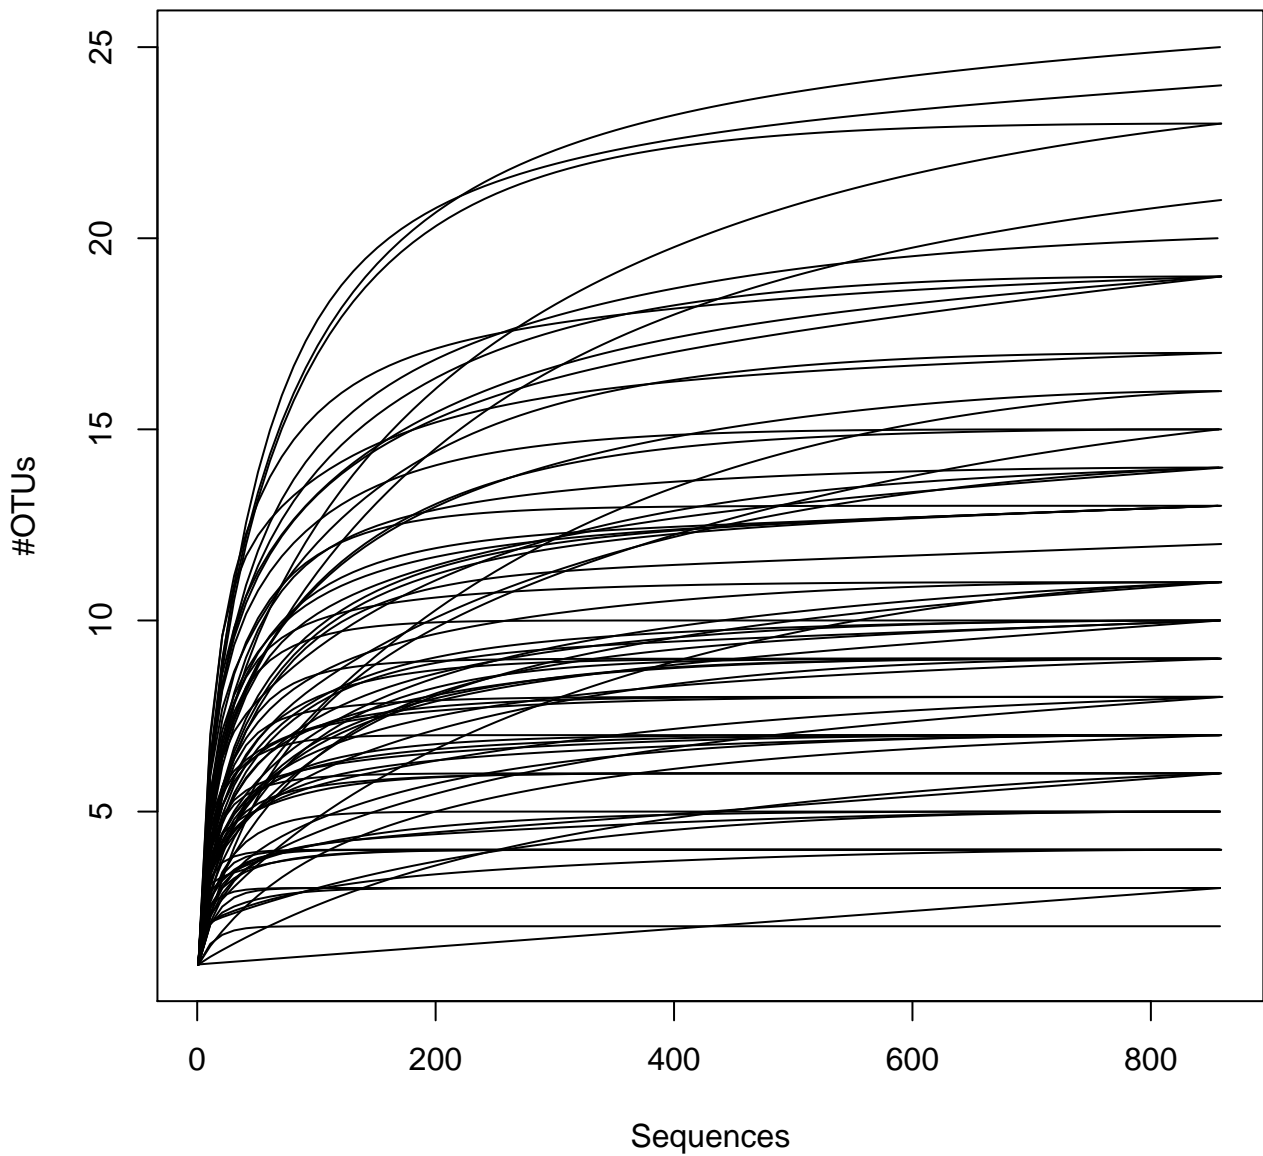

Supplement: s1 [file s1]
